# Supplementary material for: Novel insights into the pathogenesis of thyroid eye disease through ferroptosis-related gene signature and immune infiltration analysis
Source: publisher site journal article supplement (doi:10.18632/aging.205685), 2024-03-25
Supplement: Supplementary file [file aging-v16i7-205685-supplementary-material-SD2.pdf]

**Supplementary Table 2. Baseline characteristics of 23 samples in normal group.**

| No. | ID       | Gender | Age | Surgery                 | Eye | EP        | CT                                |
|-----|----------|--------|-----|-------------------------|-----|-----------|-----------------------------------|
| 1   | 21004076 | F      | 56  | Orbital fracture repair | OD  | 11-112-14 | Fracture of medial orbital wall   |
| 2   | 21002345 | M      | 65  | Orbital fracture repair | OD  | 12-105-16 | Fracture of inferior orbital wall |
| 3   | 21003038 | F      | 36  | Orbital fracture repair | OS  | 14-104-12 | Fracture of medial orbital wall   |
| 4   | 20049698 | F      | 36  | blepharoplasty          | OD  | /         | /                                 |
| 5   | 21005477 | F      | 40  | Orbital fracture repair | OD  | 14-106-16 | Fracture of inferior orbital wall |
| 6   | 21003596 | M      | 37  | Orbital fracture repair | OS  | 16-106-14 | Fracture of medial orbital wall   |
| 7   | 21000884 | F      | 43  | blepharoplasty          | OS  | /         | /                                 |
| 8   | 21004349 | M      | 41  | Orbital fracture repair | OS  | 15-110-13 | Fracture of medial orbital wall   |
| 9   | 21002403 | F      | 52  | blepharoplasty          | OD  | /         | /                                 |
| 10  | 21008886 | F      | 32  | Orbital fracture repair | OD  | 14-108-16 | Fracture of medial orbital wall   |
| 11  | 20050052 | F      | 23  | blepharoplasty          | OS  | /         | /                                 |
| 12  | 21006940 | M      | 28  | Orbital fracture repair | OS  | 15-104-12 | Fracture of medial orbital wall   |
| 13  | 21008307 | M      | 77  | Orbital fracture repair | OD  | 13-110-16 | Fracture of medial orbital wall   |
| 14  | 21008395 | M      | 33  | Orbital fracture repair | OD  | 17-120-19 | Fracture of inferior orbital wall |
| 15  | 20051723 | M      | 60  | Orbital fracture repair | OS  | 15-109-12 | Fracture of inferior orbital wall |
| 16  | 21022414 | M      | 37  | Orbital fracture repair | OD  | 15-118-18 | Fracture of inferior orbital wall |
| 17  | 21018808 | M      | 50  | Orbital fracture repair | OS  | 20-115-19 | Fracture of medial orbital wall   |
| 18  | 21023630 | M      | 52  | Orbital fracture repair | OD  | 18-117-16 | Fracture of inferior orbital wall |
| 19  | 21028737 | F      | 58  | blepharoplasty          | OS  | /         | /                                 |
| 20  | 21029104 | F      | 65  | blepharoplasty          | OD  | /         | /                                 |
| 21  | 21042246 | F      | 56  | blepharoplasty          | OD  | /         | /                                 |
| 22  | 21014687 | F      | 58  | blepharoplasty          | OS  | /         | /                                 |
| 23  | 21020717 | F      | 52  | blepharoplasty          | OS  | /         | /                                 |

F, female; M, male; OD, Oculus Dexter; OS, Oculus Sinister; OU, Oculus Uterque; EP, eyeball protrusion.

**Supplementary Table 3. Basic information of primary antibodies for WB and IHC.**

|     | <b>No.</b> | <b>Target</b>            | <b>Company</b> | <b>Product code</b> | <b>Species</b> |
|-----|------------|--------------------------|----------------|---------------------|----------------|
| WB  | 1          | APOD-33KD                | Proteintech    | 10520-1-AP          | Rabbit         |
|     | 2          | COPB2-102KD              | ABclonal       | A21294              | Rabbit         |
|     | 3          | MYCN-50KD                | Proteintech    | 10159-2-AP          | Rabbit         |
|     | 4          | MYH11-200KD              | Proteintech    | 21404-1-AP          | Rabbit         |
| IHC | 1          | CD8 Monoclonal antibody  | Proteintech    | 66868-1-Ig          | Mouse          |
|     | 2          | CD4 Monoclonal antibody  | Proteintech    | 67786-1-Ig          | Mouse          |
|     | 3          | CD19 Monoclonal antibody | Proteintech    | 66298-1-Ig          | Mouse          |
|     | 4          | CD20 Monoclonal antibody | Proteintech    | 60271-1-Ig          | Mouse          |
|     | 5          | Anti-FOXP3 [236A/E7]     | Abcam          | Ab20034             | Mouse          |
|     | 6          | IL-2RA/CD25 antibody     | Affinity       | AF7675              | Rabbit         |
|     | 7          | PC1 antibody             | Affinity       | DF14432             | Rabbit         |

WB, western blot; IHC, immunohistochemistry.
